# Supplementary material for: Metabolic engineering of a tyrosine-overproducing yeast platform using targeted metabolomics
Source: PubMed Central journal article supplement (PMC4458059; doi:10.1186/s12934-015-0252-2), 2015-05-28

**A**

**ARO4<sup>FBR</sup> + TYRC**  
 ● TY1054 : Aro10<sup>-</sup>  
 \* TY1041 : Aro10<sup>-</sup> Zwf1<sup>-</sup>

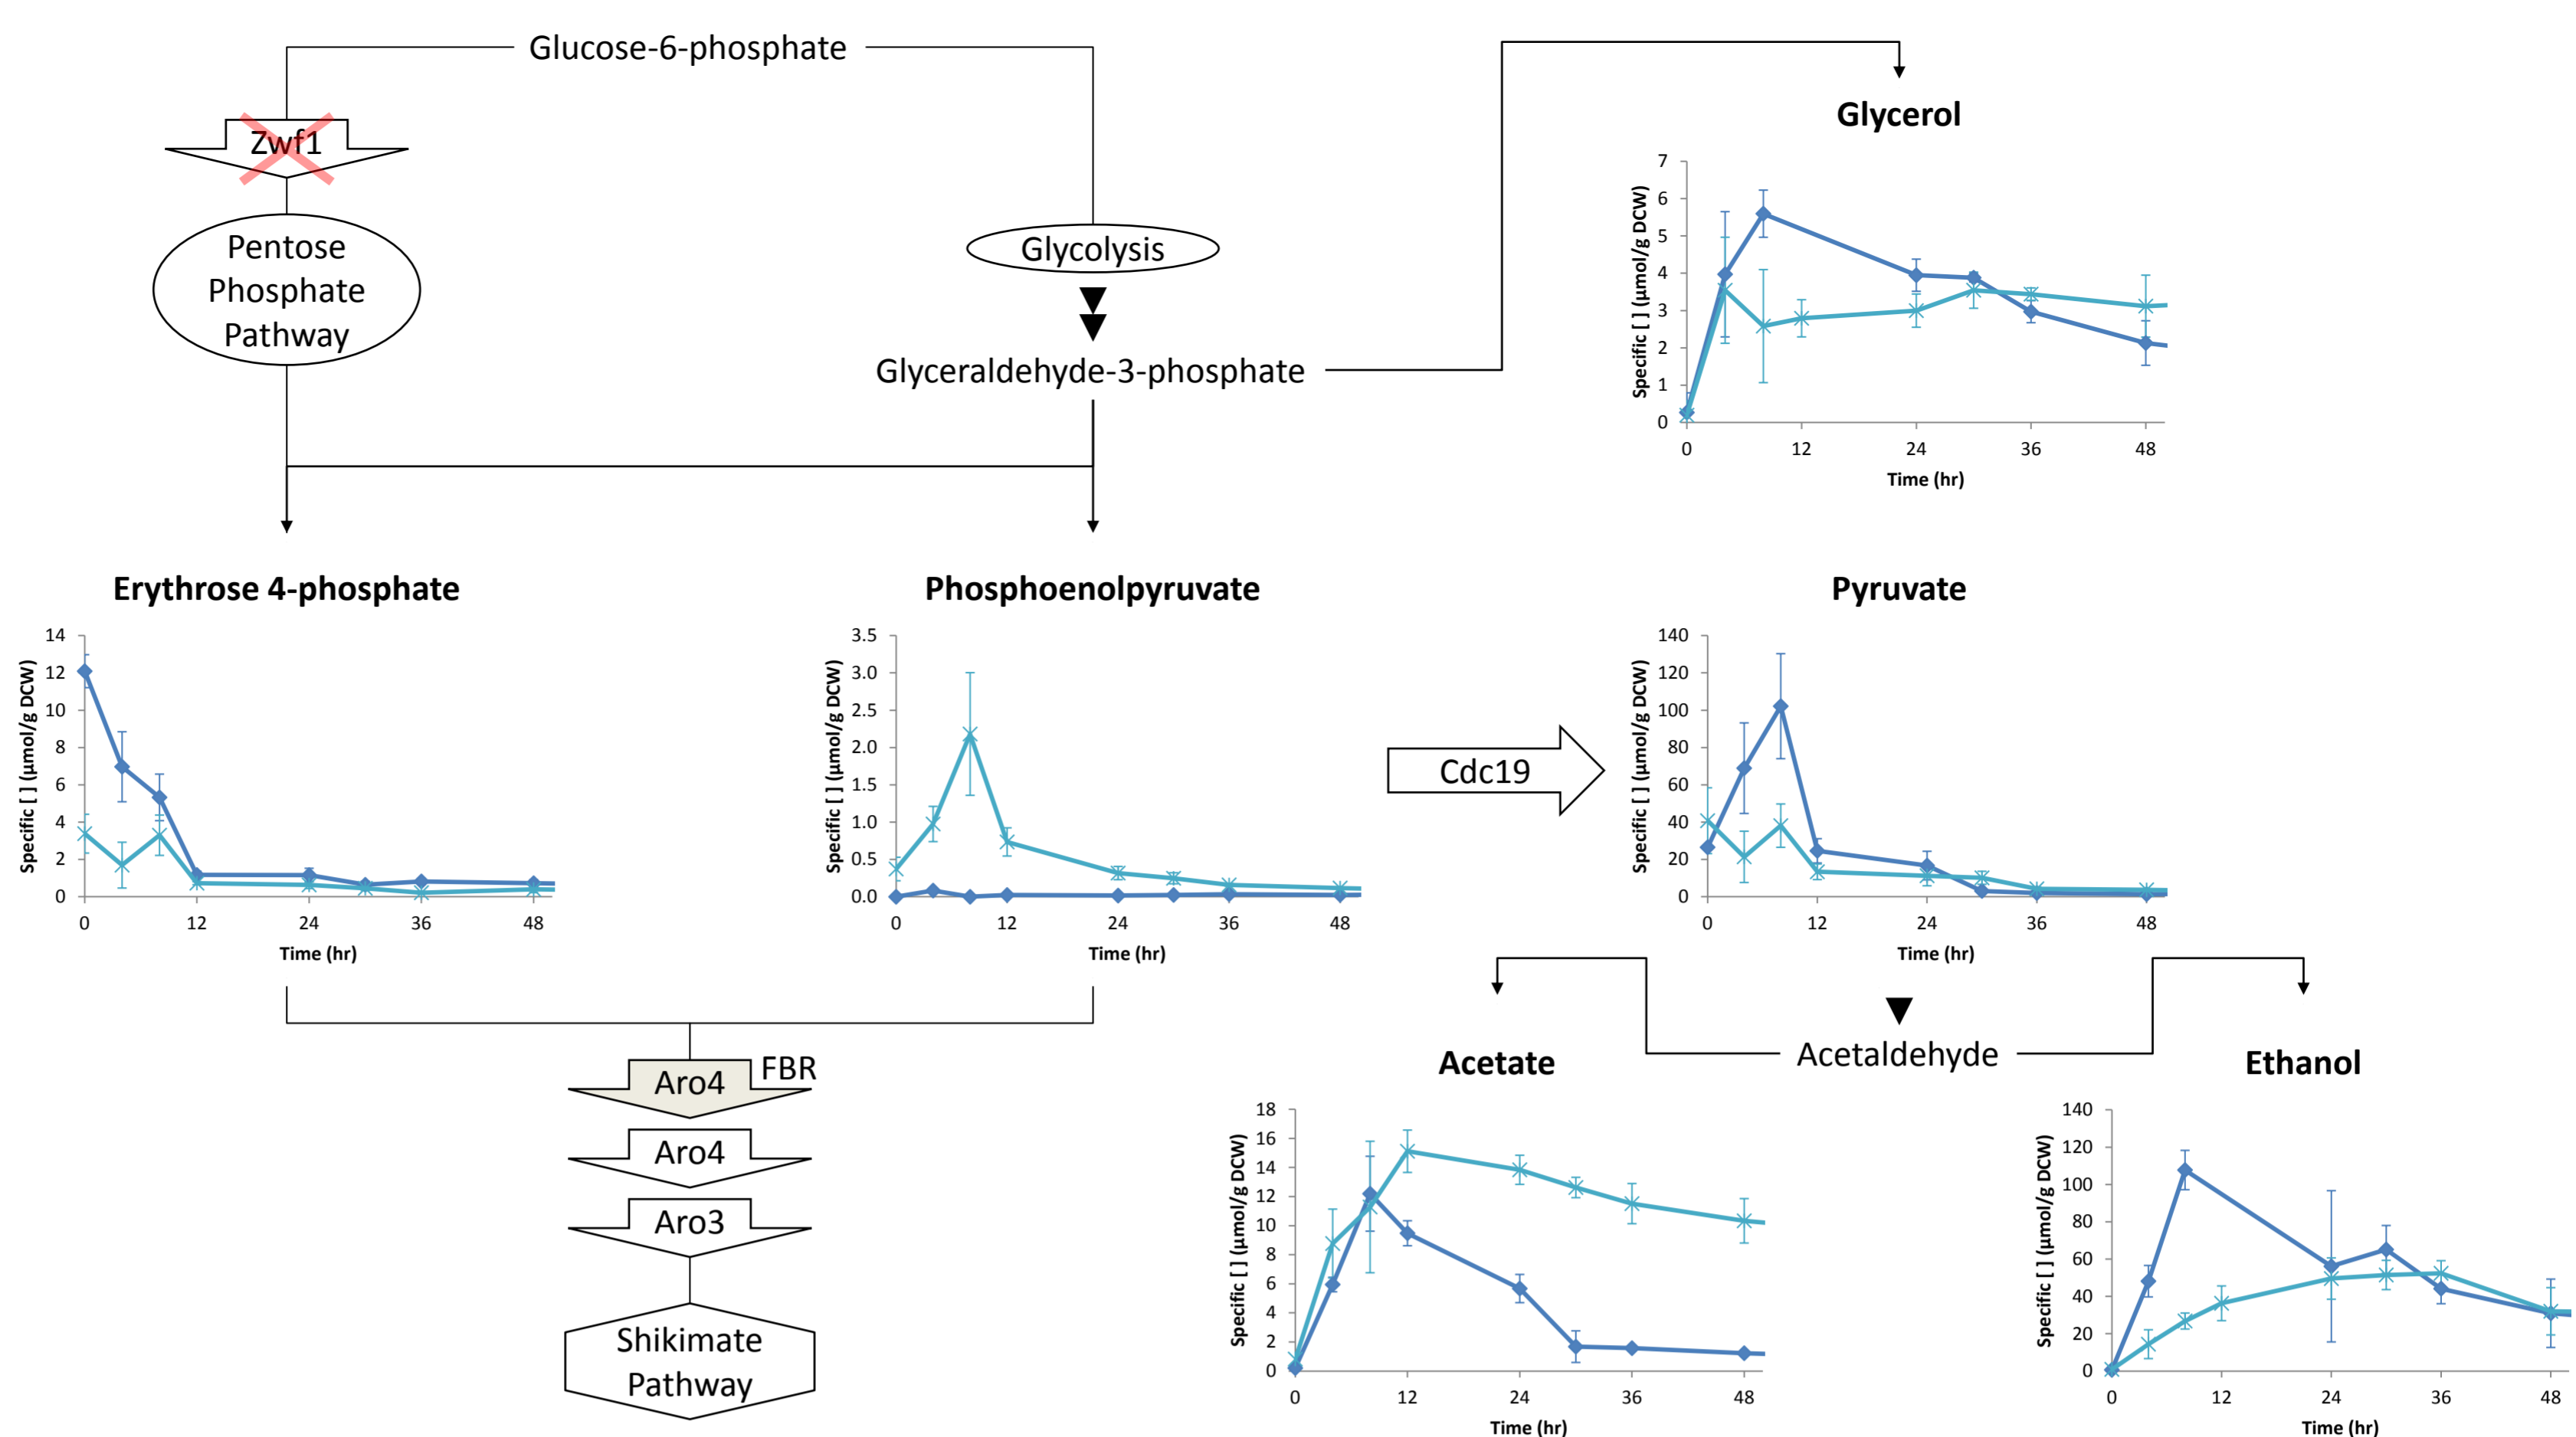**B**

**ARO4<sup>FBR</sup> + TYRC**  
 \* TY1041 : Aro10<sup>-</sup> Zwf1<sup>-</sup>  
 + TY1041 : Aro10<sup>-</sup> Zwf1<sup>-</sup> + Met in growth medium

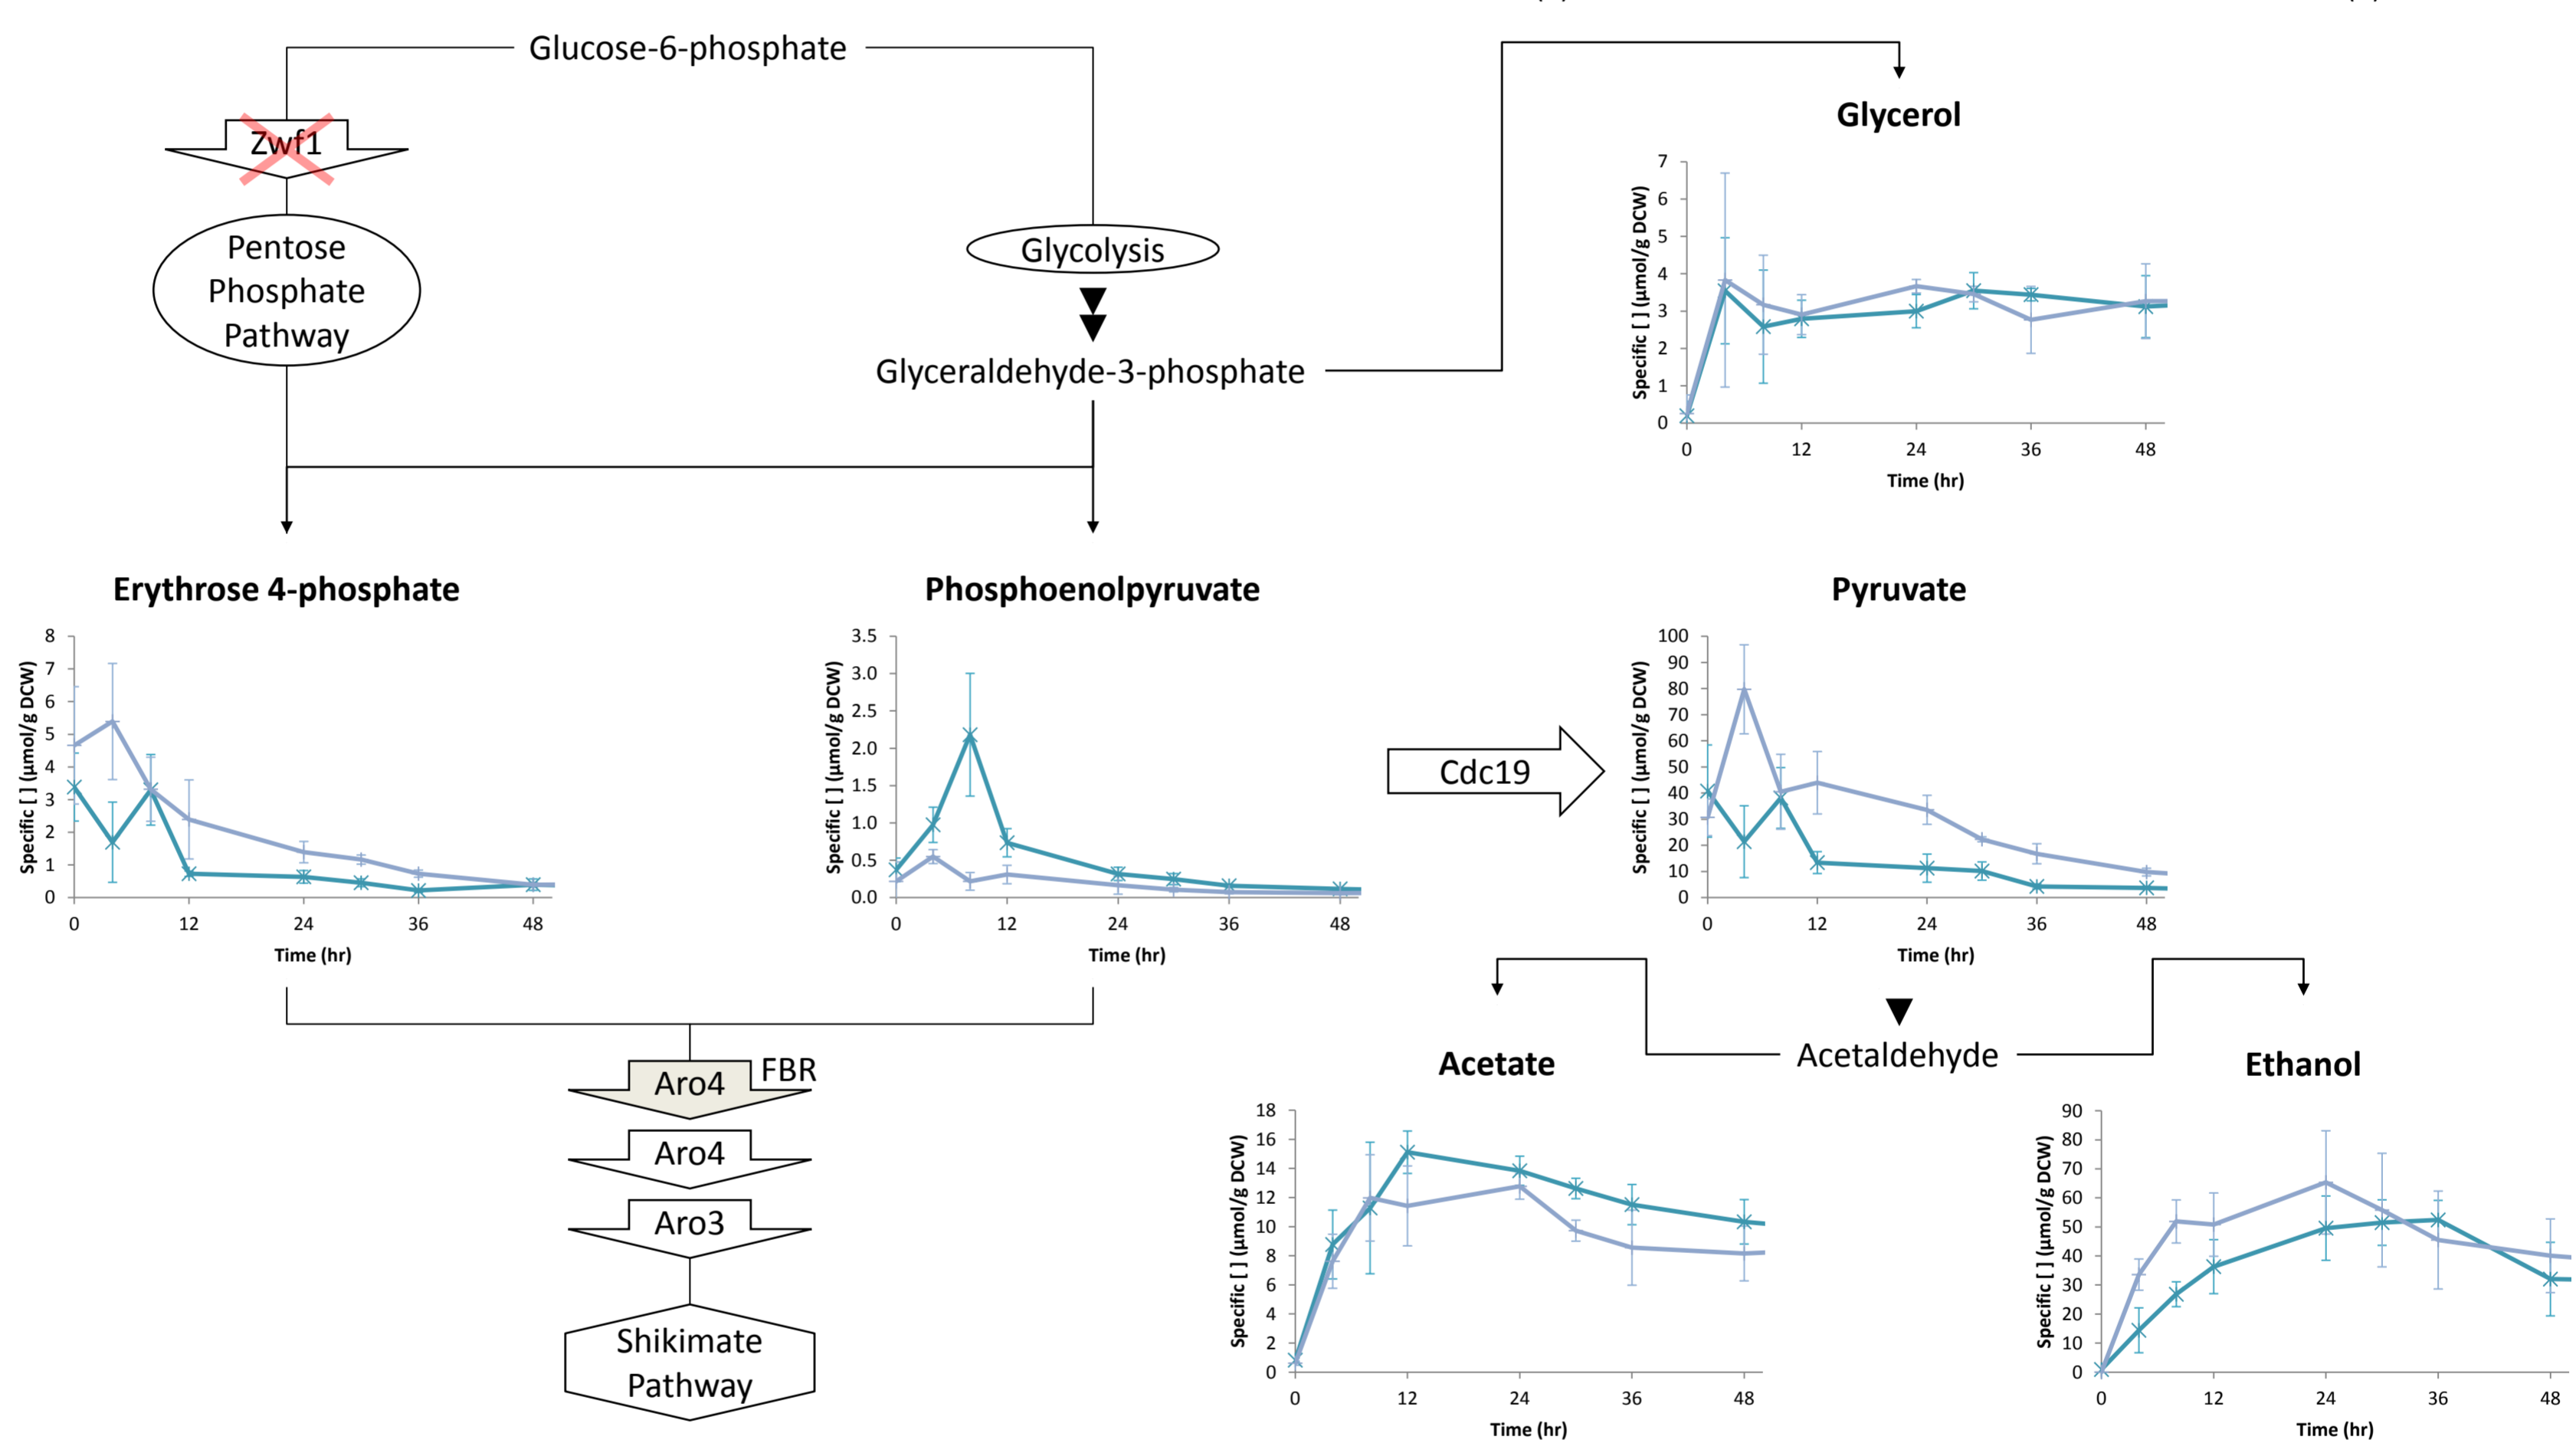**C**

**ARO4<sup>FBR</sup> + TYRC**  
 + TY1041 : Aro10<sup>-</sup> Zwf1<sup>-</sup> + Met in growth medium  
 + TY1031 : Aro10<sup>-</sup> Zwf1<sup>-</sup> Cdc19<sup>low</sup> + Met in growth medium

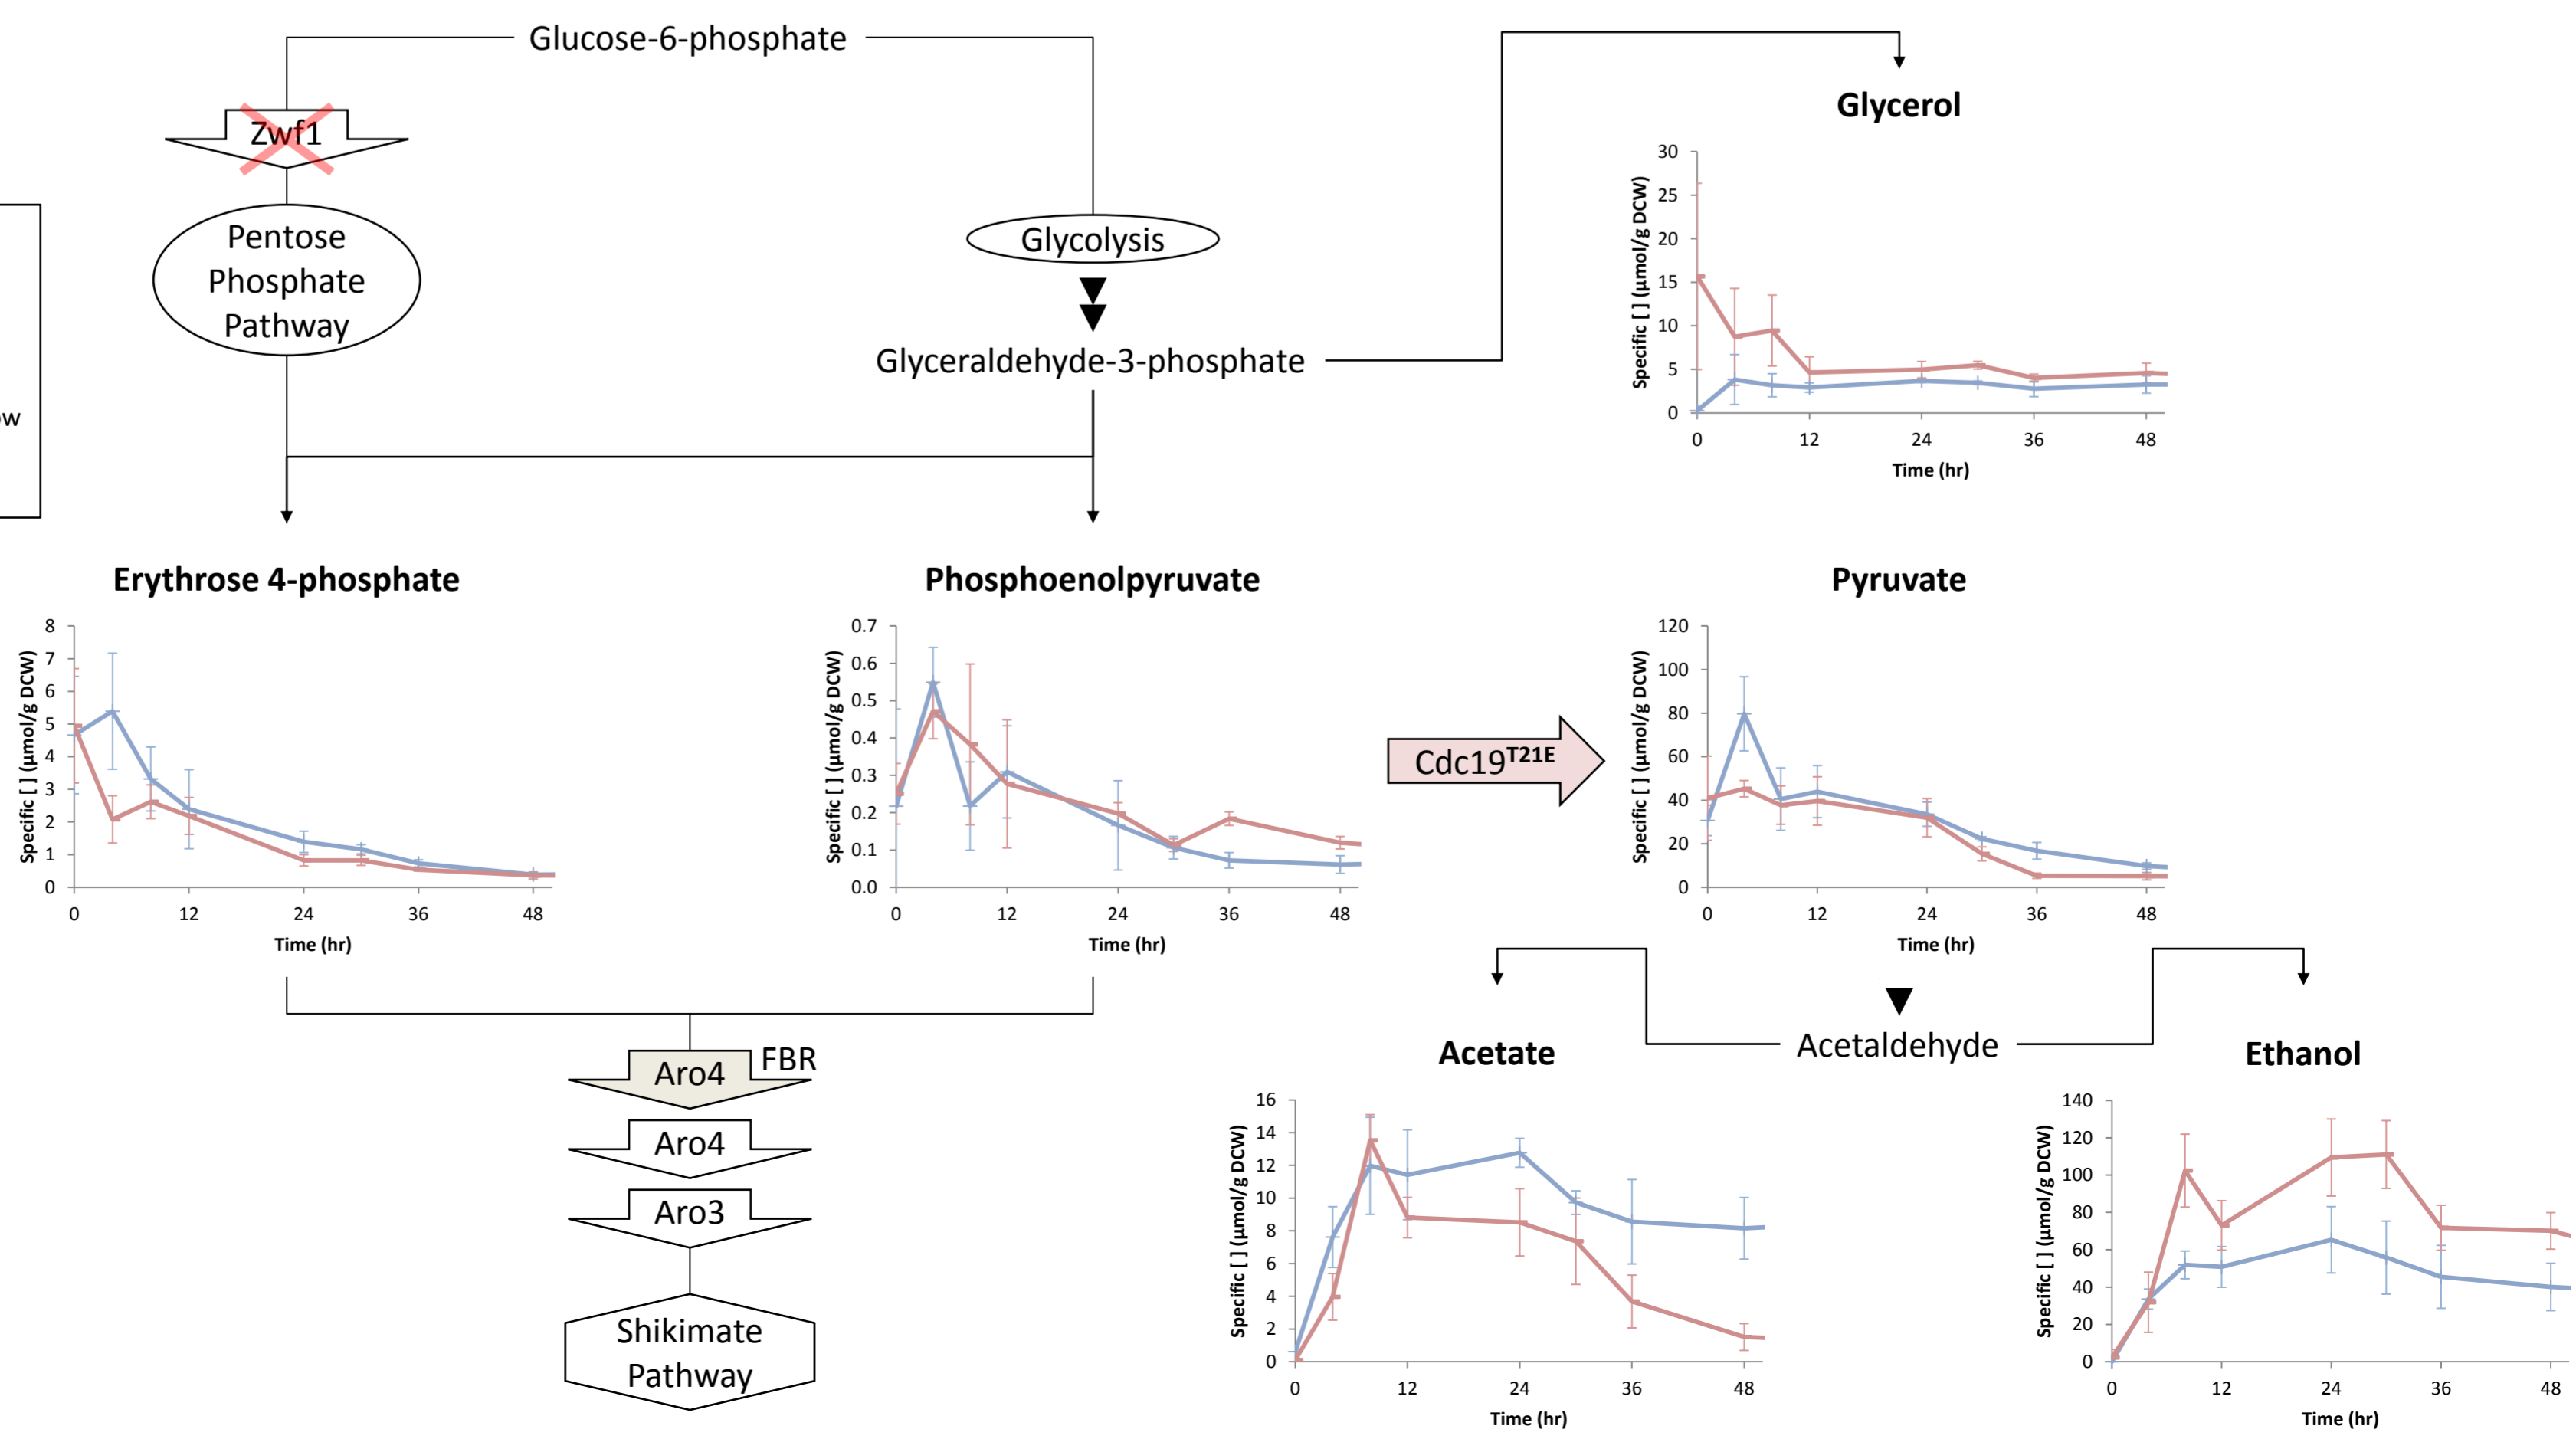

Supplement: 12934_2015_252_MOESM6_ESM.pdf [file 12934_2015_252_MOESM6_ESM.pdf]
