# Supplementary material for: Metabolic engineering of a tyrosine-overproducing yeast platform using targeted metabolomics
Source: PubMed Central journal article supplement (PMC4458059; doi:10.1186/s12934-015-0252-2), 2015-05-28

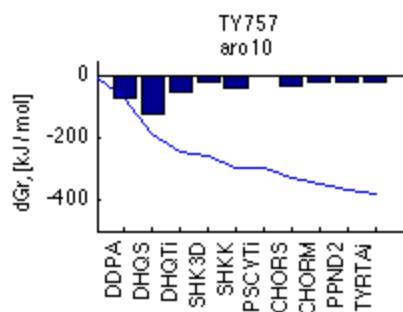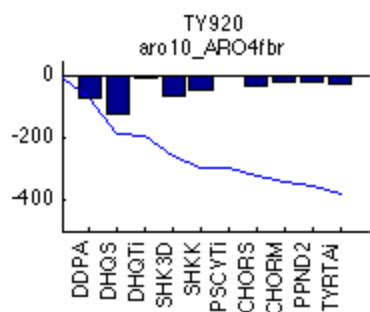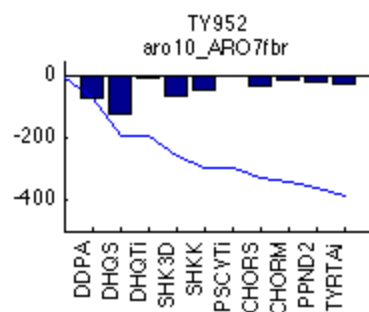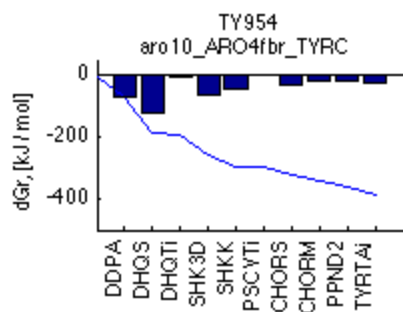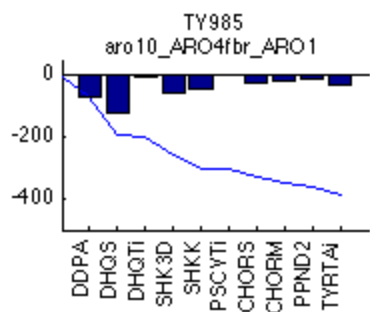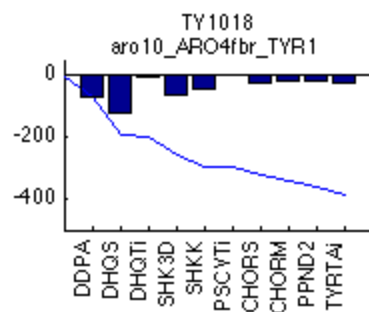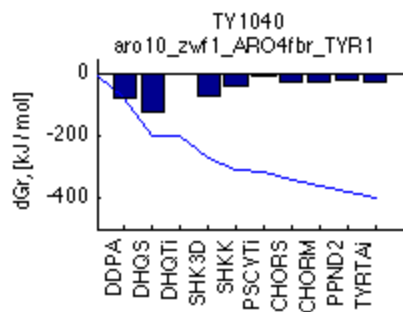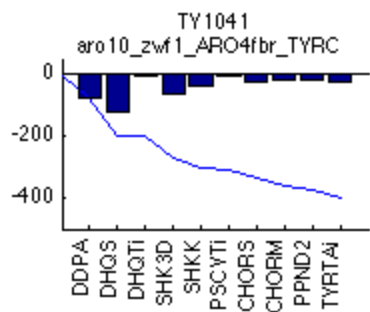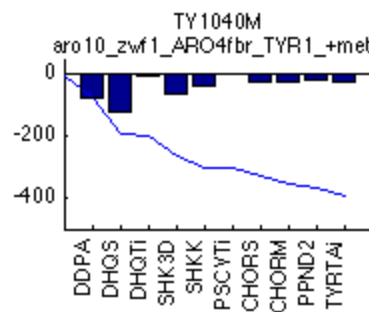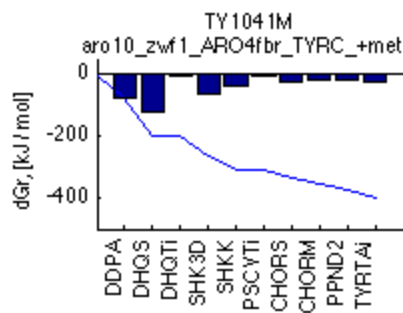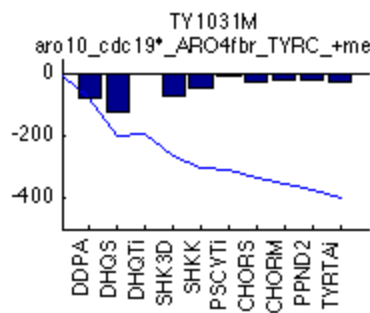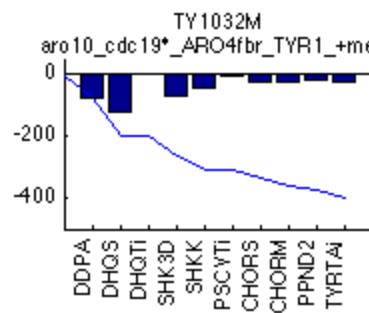

Supplement: 12934_2015_252_MOESM7_ESM.pdf [file 12934_2015_252_MOESM7_ESM.pdf]
